# Supplementary material
Source: PubMed Central journal article supplement (PMC4466465)
Supplement: ijbsv11p0845s1.pdf [file ijbsv11p0845s1.pdf]

A

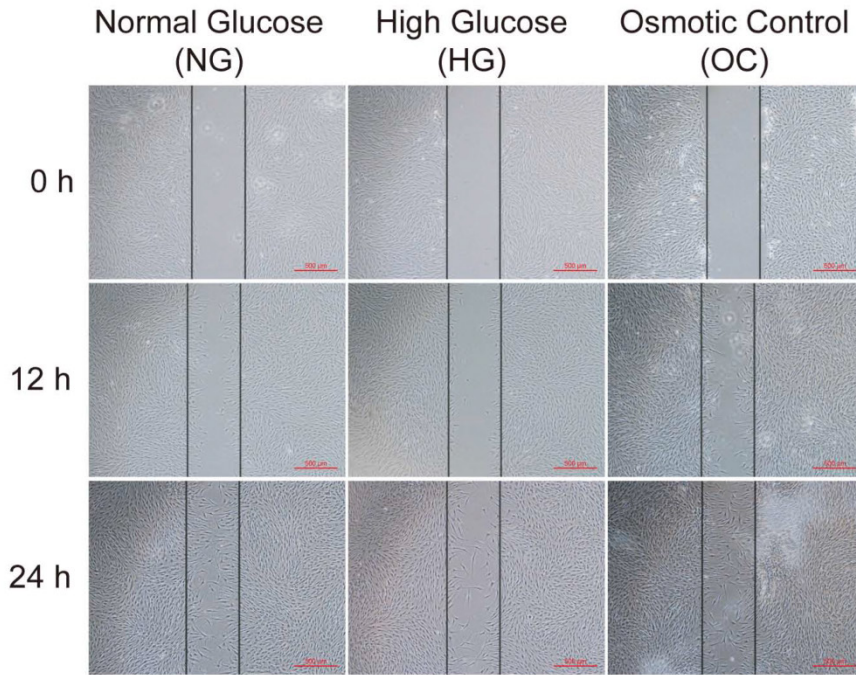

B

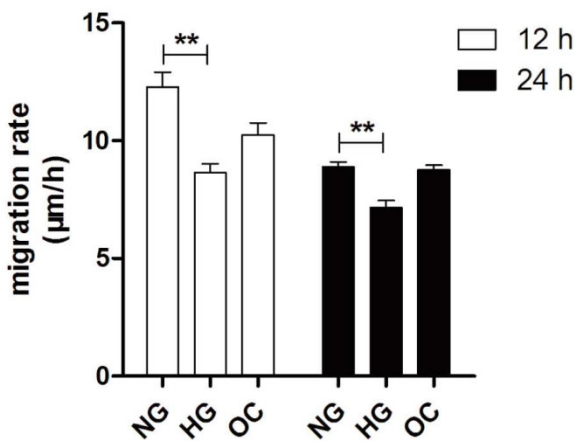

C

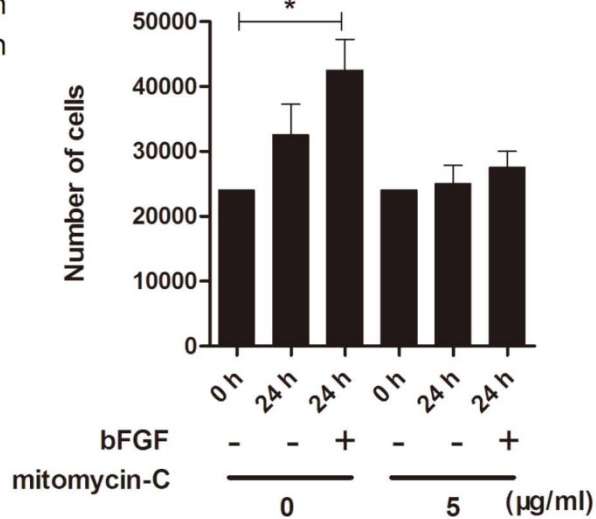

**Fig. S1. High glucose impaired dermal fibroblast migration.** (A) Migratory ability of dermal fibroblasts under indicated condition was detected at 12 h and 24 h after wounding using wound-healing assay. The black line indicates the wound edge immediately after wounding. The scale bar represents 500  $\mu\text{m}$ . (B) The distances between front edges of those selected cells at 12 or 24 hours after wounding and wound edge immediately after wounding were measured and expressed as migrating distance per hour. (C) Mitomycin-C at a concentration of 5  $\mu\text{g/ml}$  blocked bFGF-induced dermal fibroblast proliferation. \* $P < 0.05$  and \*\* $P < 0.01$  compared with the indicated control group.
